# Supplementary material
Source: HighWire-hosted journal article supplement (https://bmjopen.bmj.com/content/10/1/e034114)
Supplement: inline-supplementary-material-1 [file inline-supplementary-material-1.pdf]

**Additional file 1:**

The electronic search strategy for PubMed:

```
((((((hepatitis B[MeSH Terms]) OR hepatitis B virus[MeSH Terms]) OR Hepatitis B Surface Antigens[MeSH Terms]) OR hepatitis B[Text Word]) OR hepatitis B virus[Text Word]) OR HBV[Text Word]) OR HBsAg[Text Word]) AND ( "0001/01/01"[PDat] : "2019/11/30"[PDat] ) AND ((((((ABO Blood-Group System[MeSH Terms]) OR Rh-Hr Blood-Group System[MeSH Terms]) OR blood type[Text Word]) OR blood group[Text Word]) OR ABO[Text Word]) OR Rh[Text Word]) OR rhesus[Text Word]) AND ( "0001/01/01"[PDat] : "2019/11/30"[PDat] )
```

## Additional file 2:

Table S1-1: Quality assessment for cross-sectional studies by Agency for Healthcare Research and Quality table.

| Author                             | 1 | 2 | 3 | 4 | 5 | 6 | 7 | 8 | 9 | 10 | 11 | Total |
|------------------------------------|---|---|---|---|---|---|---|---|---|----|----|-------|
| Terrier, E.1970 <sup>27</sup>      | Y | N | N | U | U | Y | / | N | / | Y  | Y  | 4     |
| Leski, M.1970 <sup>28</sup>        | Y | N | Y | N | U | Y | N | N | / | Y  | Y  | 5     |
| Szmunness, W.1971 <sup>19</sup>    | Y | Y | Y | Y | U | Y | / | N | Y | Y  | Y  | 8     |
| Zuberi, S. J.1974 <sup>29</sup>    | Y | N | Y | Y | U | Y | / | N | / | Y  | Y  | 6     |
| Vale, T. G.1974 <sup>30</sup>      | Y | N | Y | Y | U | Y | / | N | / | Y  | Y  | 6     |
| Moore, H. H.1975 <sup>31</sup>     | Y | N | Y | Y | U | Y | / | N | / | Y  | Y  | 6     |
| Szmunness, W.1975 <sup>20</sup>    | Y | Y | Y | Y | U | Y | Y | N | / | Y  | Y  | 8     |
| Lenka, M. R.1981 <sup>32</sup>     | Y | N | N | N | U | Y | / | N | Y | Y  | Y  | 5     |
| Nath, N.1985 <sup>33</sup>         | Y | Y | Y | Y | U | Y | Y | N | N | Y  | Y  | 8     |
| Kulkarni, A. G.1986 <sup>34</sup>  | Y | N | N | N | U | Y | / | N | Y | Y  | Y  | 5     |
| Naidu, A. S.1986 <sup>35</sup>     | Y | N | N | N | U | Y | / | N | Y | Y  | Y  | 5     |
| Sebastian, V. J.1989 <sup>36</sup> | Y | N | N | N | U | Y | / | N | N | Y  | Y  | 4     |
| Zhu, C.2002 <sup>37</sup>          | Y | N | Y | Y | U | Y | N | N | N | N  | Y  | 5     |
| Joshi, S. K.2003 <sup>38</sup>     | Y | Y | Y | N | U | Y | / | N | / | Y  | Y  | 6     |
| El-Gilany, A-H.2006 <sup>39</sup>  | Y | Y | Y | N | U | Y | / | N | Y | N  | Y  | 6     |
| Behal, R.2008 <sup>21</sup>        | Y | Y | Y | Y | U | Y | / | N | Y | Y  | Y  | 8     |
| Rifat-uz-Zaman2009 <sup>40</sup>   | Y | Y | Y | / | U | N | / | N | Y | Y  | Y  | 6     |
| Dirisu, J. O.2011 <sup>41</sup>    | Y | Y | Y | Y | U | Y | / | N | / | Y  | Y  | 7     |
| Saeed Anwar, M.2011 <sup>42</sup>  | Y | Y | Y | Y | U | Y | / | N | Y | Y  | Y  | 8     |
| Omar, A. A. 2012 <sup>33</sup>     | Y | N | Y | N | U | Y | / | N | / | Y  | Y  | 5     |
| Tyagi, S.2013 <sup>44</sup>        | Y | Y | Y | N | U | Y | / | N | Y | Y  | Y  | 7     |
| Sethi, B.2014 <sup>45</sup>        | Y | Y | Y | Y | U | Y | / | N | Y | Y  | Y  | 8     |
| Mohammadali, F.2014 <sup>18</sup>  | Y | Y | Y | Y | U | Y | Y | N | N | Y  | Y  | 8     |
| Nigam, J. S.2014 <sup>46</sup>     | Y | Y | Y | Y | U | Y | / | N | Y | Y  | Y  | 8     |
| Zhao, Y.2014 <sup>47</sup>         | Y | N | Y | N | U | Y | / | N | Y | Y  | Y  | 6     |
| Siransy, L. K.2015 <sup>48</sup>   | Y | Y | Y | Y | U | Y | Y | N | / | Y  | Y  | 8     |
| Navolan, D.2015 <sup>49</sup>      | Y | Y | N | N | U | Y | N | N | N | Y  | Y  | 5     |
| Bisetegen, F. S.2016 <sup>50</sup> | Y | Y | Y | N | U | Y | / | N | N | Y  | Y  | 6     |
| Abate, M.2016 <sup>51</sup>        | Y | N | Y | Y | U | Y | / | N | Y | Y  | Y  | 7     |
| Bharadva, S.2016 <sup>52</sup>     | Y | Y | Y | Y | U | Y | / | N | Y | Y  | Y  | 8     |
| Naseri, Z.2016 <sup>53</sup>       | Y | N | Y | Y | U | Y | / | N | Y | Y  | Y  | 7     |
| Memon, F. A.2017 <sup>54</sup>     | Y | Y | Y | Y | U | Y | / | N | Y | Y  | Y  | 8     |
| Liu, J.2017 <sup>17</sup>          | Y | Y | Y | Y | U | Y | Y | Y | Y | Y  | Y  | 9     |
| Batool, Z.2017 <sup>55</sup>       | Y | Y | Y | Y | U | Y | U | N | U | N  | Y  | 6     |
| Ngassaki-Y, C-D.2018 <sup>56</sup> | Y | Y | Y | Y | U | Y | / | N | / | Y  | Y  | 7     |
| Fu, X.2018 <sup>57</sup>           | Y | Y | Y | Y | U | Y | Y | N | N | Y  | Y  | 8     |
| Nkansah, C.2019 <sup>58</sup>      | Y | Y | Y | Y | U | Y | Y | N | / | Y  | Y  | 8     |

Y, Yes; N, No; U, Unclear; /, not applicable.

Note:

Item 1: Define the source of information (survey, record review).

- 
- Item 2: List inclusion and exclusion criteria for exposed and unexposed subjects (cases and controls) or refer to previous publications.
- Item 3: Indicate time period used for identifying patients.
- Item 4: Indicate whether or not subjects were consecutive if not population-based.
- Item 5: Indicate if evaluators of subjective components of study were masked to other aspects of the status of the participants.
- Item 6: Describe any assessments undertaken for quality assurance purposes (e.g., test/retest of primary outcome measurements).
- Item 7: Explain any patient exclusions from analysis.
- Item 8: Describe how confounding was assessed and/or controlled.
- Item 9: If applicable, explain how missing data were handled in the analysis.
- Item 10: Summarize patient response rates and completeness of data collection.
- Item 11: Clarify what follow-up, if any, was expected and the percentage of patients for which incomplete data or follow-up was obtained.

**Table S1-2:** Quality assessment for cohort studies by Newcastle-Ottawa Scales table.

| Author                       | Selection | Comparability | Outcome | Total |
|------------------------------|-----------|---------------|---------|-------|
| T. T. Lao 2014 <sup>16</sup> | 3         | 1             | 3       | 7     |

Note:

Selection: 1) Representativeness of the exposed cohort; 2) Selection of the non-exposed cohort; 3) Ascertainment of exposure; 4) Demonstration that outcome of interest was not present at start of study.

Comparability: 1) Comparability of cohorts on the basis of the design or analysis.

Outcome: 1) Assessment of outcome; 2) Was follow-up long enough for outcomes to occur; 3) Adequacy of follow up of cohorts.
